# Supplementary material for: Genome-wide identification and analysis of miRNA-related single nucleotide polymorphisms (SNPs) in rice
Source: PubMed Central journal article supplement (PMC4883715; doi:10.1186/1939-8433-6-10), 2013-04-23

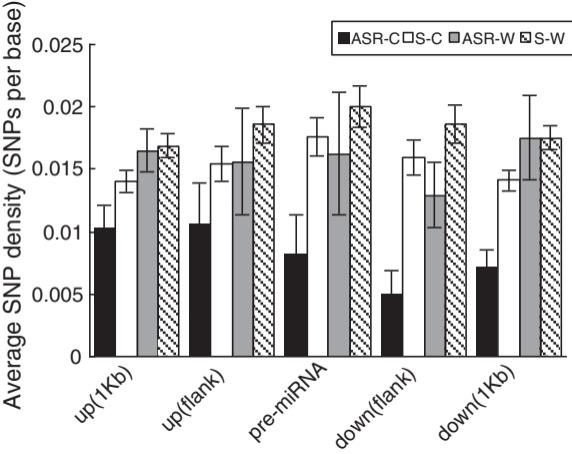

Supplement: 12284_2012_46_MOESM14_ESM.pdf [file 12284_2012_46_MOESM14_ESM.pdf]
